# Supplementary material
Source: publisher figshare collection journal article supplement (https://acs.figshare.com/ndownloader/files/4520722)
Supplement: Supplementary file 1 [file 4520722]

## Supporting Information

### Encapsulation of Unusual Nitrate-Water Cluster $[(\text{NO}_3)_4(\text{H}_2\text{O})_6]^{4-}$ Anions into Cages of a 3D Cationic Coordination Polymer

Dong Liu,<sup>†</sup> Hong-Xi Li,<sup>†</sup> Zhi-Gang Ren,<sup>†</sup> Yang Chen,<sup>†</sup> Yong Zhang,<sup>†</sup> Jian-Ping Lang,<sup>\*,†,‡</sup>

<sup>†</sup> *College of Chemistry, Chemical Engineering and Materials Science, Suzhou University, Suzhou 215123, People's Republic of China*

<sup>‡</sup> *State Key Laboratory of Organometallic Chemistry, Shanghai Institute of Organic Chemistry, Chinese Academy of Sciences, Shanghai 200032, People's Republic of China*

## Table of Contents

|                                                                                                                                                                                                                                                                                                                                                                                                                                              |      |
|----------------------------------------------------------------------------------------------------------------------------------------------------------------------------------------------------------------------------------------------------------------------------------------------------------------------------------------------------------------------------------------------------------------------------------------------|------|
| <b>Figure S1.</b> (a) The $^1\text{H}$ NMR spectrum of <b>1</b> in $d_6$ -DMSO at ambient temperature. (b) The $^1\text{H}$ NMR spectrum of <b>1a</b> in $d_6$ -DMSO at ambient temperature. ....                                                                                                                                                                                                                                            | S3   |
| <b>Figure S2.</b> Powder XRD patterns of (a) simulated $\{[\text{Ag}_2(\text{bpe})_2](1,4\text{-BDC})\cdot(1,4\text{-H}_2\text{BDC})\}_n$ ( <b>1</b> ) from single crystal analysis and experimental; (b) $\{[\text{Ag}_2(\text{bpe})_2](1,4\text{-BDC})\cdot(1,4\text{-H}_2\text{BDC})\}_n$ ( <b>1</b> ) (as synthesized); (c) $\{[\text{Ag}_2(4,4'\text{-tpcb})_2](1,4\text{-BDC})\cdot(1,4\text{-H}_2\text{BDC})\}_n$ ( <b>1a</b> ). .... | S4   |
| <b>Figure S3.</b> The IR spectra of <b>1</b> (a), <b>1a</b> (b), and <b>2</b> (c). ....                                                                                                                                                                                                                                                                                                                                                      | S5-6 |
| <b>Figure S4.</b> The TGA curves for <b>1</b> (black), <b>1a</b> (red) and <b>2</b> (blue). ....                                                                                                                                                                                                                                                                                                                                             | S7   |
| <b>Figure S5.</b> An adamantane-type unit within a single network of $[\text{Ag}(4,4'\text{-tpcb})_{0.75}]_n^{n+}$ in <b>2</b> . Hydrogen atoms have been omitted for clarity. ....                                                                                                                                                                                                                                                          | S8   |

(a)

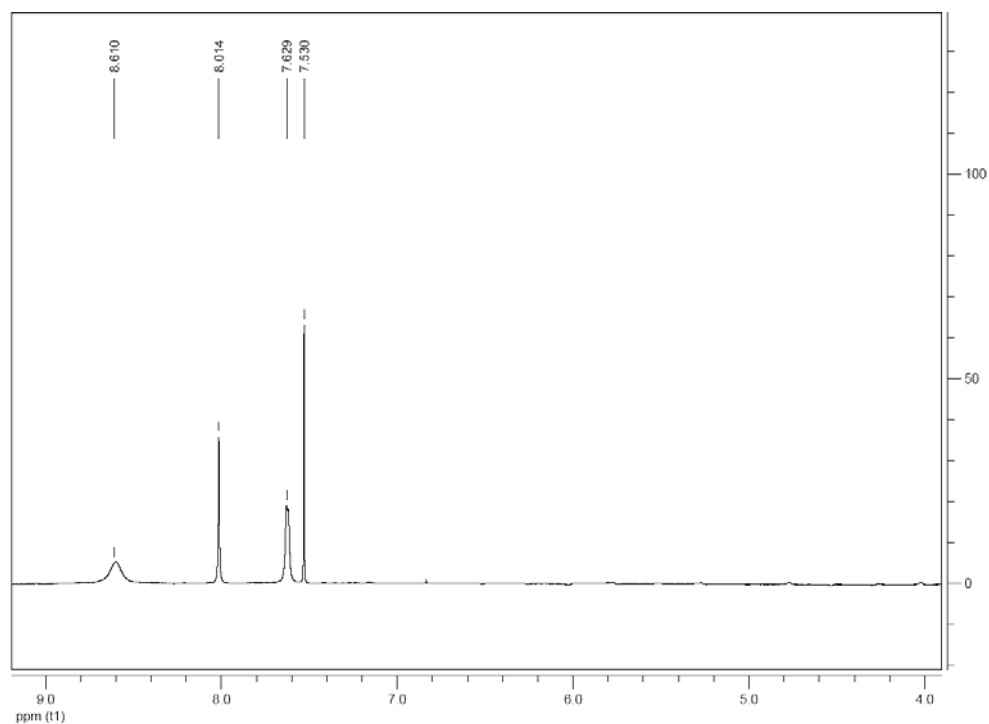

(b)

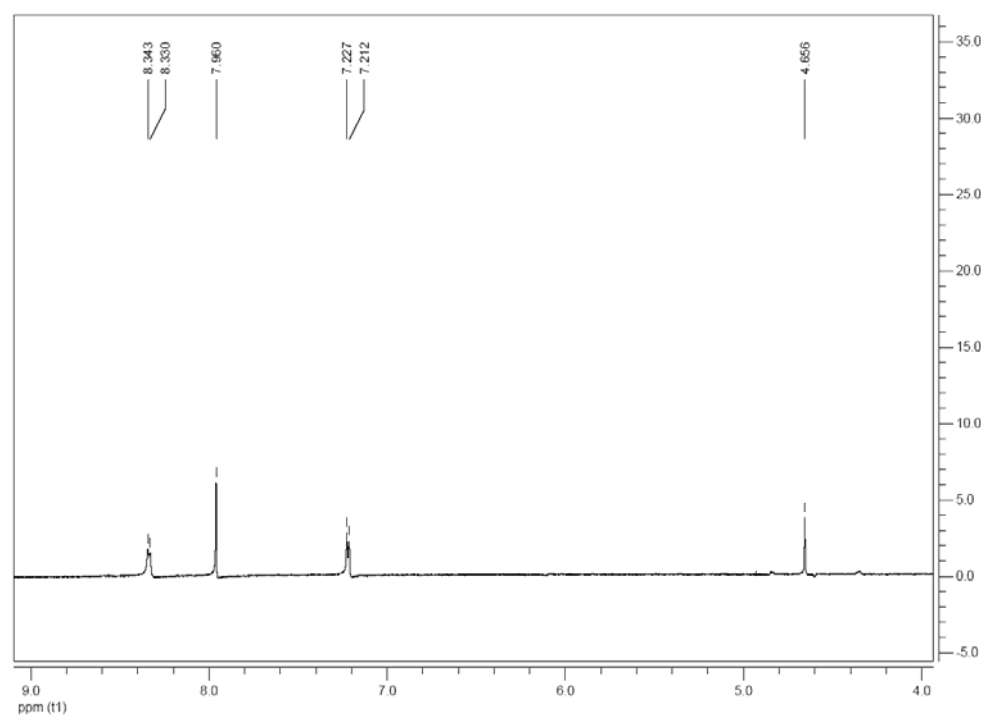

**Figure S1.** (a) The <sup>1</sup>H NMR spectrum of **1** in *d*<sub>6</sub>-DMSO at ambient temperature. (b) The <sup>1</sup>H NMR spectrum of **1a** in *d*<sub>6</sub>-DMSO at ambient temperature

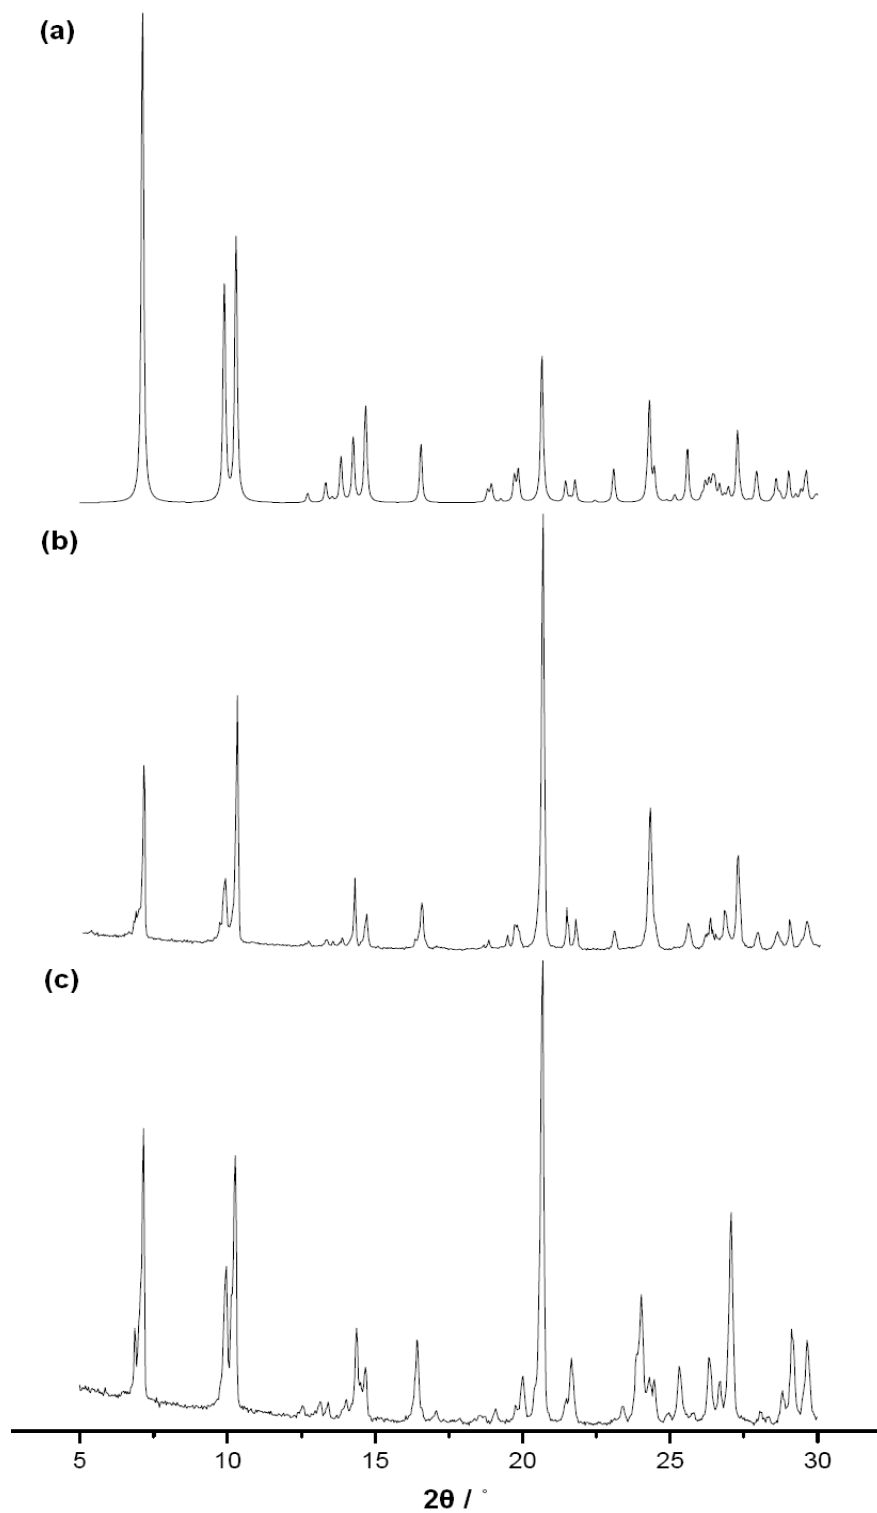

**Figure S2.** Powder XRD patterns of (a) simulated  $\{[\text{Ag}_2(\text{bpe})_2](1,4\text{-BDC})\cdot(1,4\text{-H}_2\text{BDC})\}_n$  (**1**) from single crystal analysis and experimental; (b)  $\{[\text{Ag}_2(\text{bpe})_2](1,4\text{-BDC})\cdot(1,4\text{-H}_2\text{BDC})\}_n$  (**1**) (as synthesized); (c)  $\{[\text{Ag}_2(4,4'\text{-tpcb})_2](1,4\text{-BDC})\cdot(1,4\text{-H}_2\text{BDC})\}_n$  (**1a**) (UV irradiation form **1**).

(a)

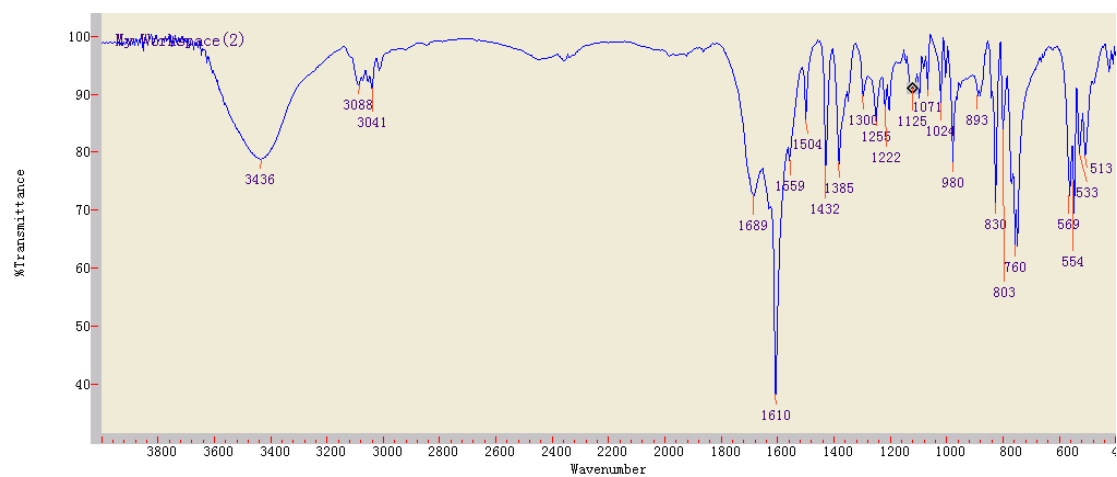

(b)

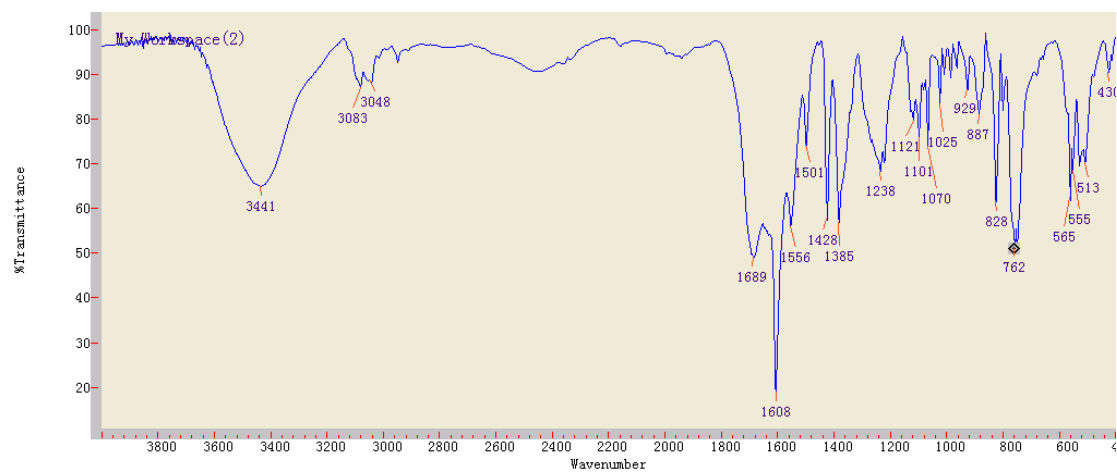

(c)

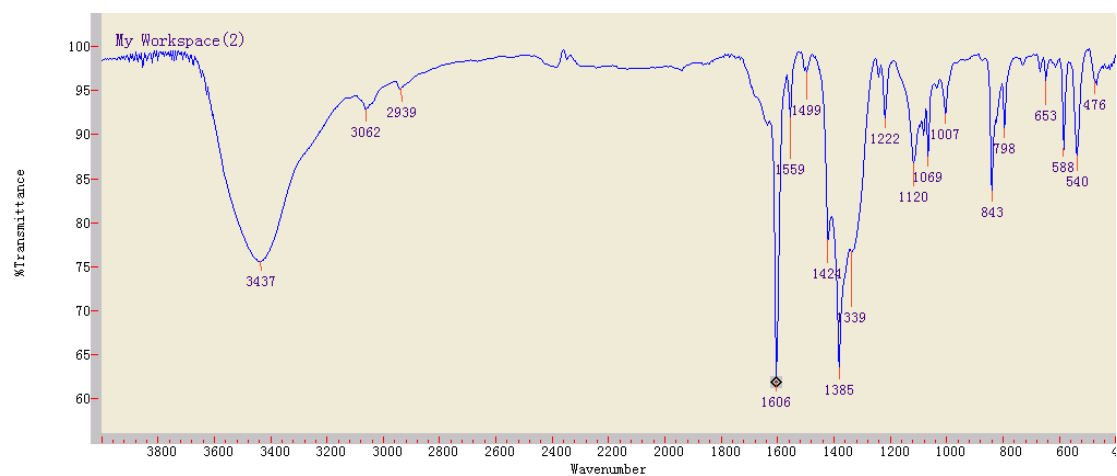

**Figure S3.** (a) The IR spectrum of **1**. (b) The IR spectrum of **1a**. (c) The IR spectrum of **2**.

**Notes:** Strong bands in the region of  $1440\text{--}1315\text{ cm}^{-1}$ , especially those at  $1424/1339\text{ cm}^{-1}$  of the IR spectrum of **2** indicate the existence of  $\text{NO}_3^-$ .<sup>1a</sup> Bands at  $653/588\text{ cm}^{-1}$  are also characteristic bands of  $\text{NO}_3^-$ .<sup>1b,1c</sup>

1. (a) Nakamoto, K. *Infrared and Raman Spectra of Inorganic and Coordination Compounds*, 4th ed., Wiley, New York, **1986**, pp. 254-257; b) González Lebrero, M. C.; Bikiel, D. E.; Dolores Elola, M.; Estrin, D. A.; Roitberg, A. E. *J. Chem. Phys.* **2002**, *117*, 2718-2725 (c) Bianco, R.; Wang, S. Z.; Hynes, J. T. *J. Phys. Chem. A* **2008**, *112*, 9467–9476.

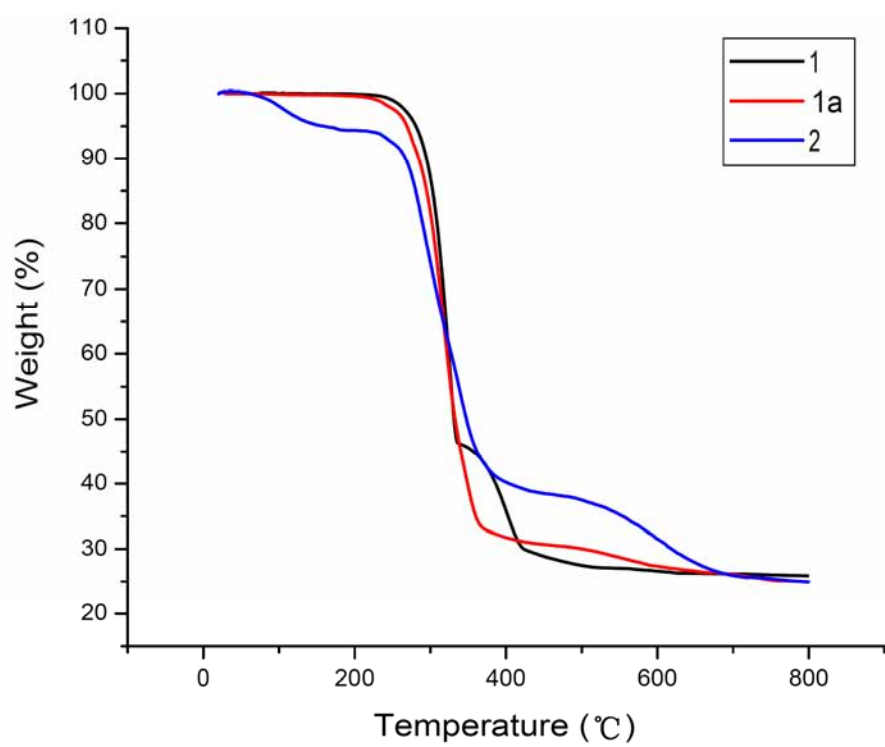

**Figure S4.** The TGA curves for **1** (black), **1a** (red) and **2** (blue).

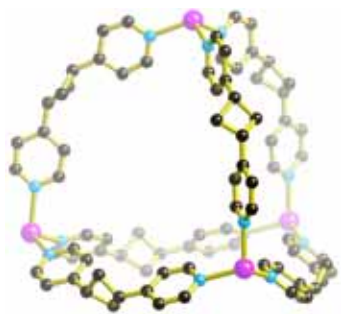

**Figure S5.** An adamantane-type unit within a single network of  $[\text{Ag}(4,4'\text{-tpcb})_{0.75}]_n^{n+}$  in **2**.

Hydrogen atoms have been omitted for clarity.
